# Supplementary material for: A randomized controlled trial comparing intravenous ferric carboxymaltose with oral iron for treatment of iron deficiency anaemia of non-dialysis-dependent chronic kidney disease patients
Source: PubMed Central journal article supplement — Nephrol Dial Transplant. 2010 Oct 7;26(5):1599–607. doi: 10.1093/ndt/gfq613 (PMC3084440; doi:10.1093/ndt/gfq613), 2010-10-07
Supplement: supp_gfq613_gfq613_suppl.pdf [file supp_gfq613_gfq613_suppl.pdf]

Supplementary Table 1. **Subjects who experienced serious adverse events (safety population)**

| Subject number   | Age/sex/race | Preferred term                                | Relative day <sup>a</sup> |            | Severity | Causality <sup>b</sup> | Treatment  |
|------------------|--------------|-----------------------------------------------|---------------------------|------------|----------|------------------------|------------|
|                  |              |                                               | Onset                     | Resolution |          |                        |            |
| <b>FCM</b>       |              |                                               |                           |            |          |                        |            |
| 113              | 72/F/C       | Ovarian cancer <sup>c</sup>                   | 34                        | Ongoing    | Moderate | None                   | Surgical   |
| 126              | 45/M/C       | Coronary artery disease                       | 47                        | 48         | Severe   | None                   | Other      |
| 140              | 45/M/Hisp    | Skin infection                                | 2                         | 12         | Severe   | None                   | Surgical   |
|                  |              | Postoperative fever                           | 22                        | 31         | Severe   | None                   | Surgical   |
| 182              | 56/F/Other   | Pancreatitis acute                            | 25                        | 30         | Moderate | None                   | None       |
| 186              | 46/M/Hisp    | Cardiac failure congestive                    | 3                         | 5          | Severe   | None                   | Medication |
|                  |              | Upper respiratory tract infection             | 3                         | 17         | Severe   | None                   | Medication |
|                  |              | Cardiac failure congestive                    | 17                        | 19         | Severe   | None                   | Medication |
|                  |              | Coronary artery disease                       | 51                        | 53         | Severe   | None                   | None       |
| 216              | 85/M/C       | Sepsis <sup>c,d</sup>                         | 33                        | 36         | Severe   | None                   | Medication |
| 238              | 73/M/C       | Colon cancer                                  | 36                        | Ongoing    | Severe   | None                   | Other      |
| 253              | 50/F/C       | Pulmonary embolism                            | 57                        | 71         | Moderate | None                   | Medication |
| 326              | 63/F/C       | Cellulitis                                    | 40                        | Ongoing    | Severe   | None                   | Medication |
| 335              | 73/F/Asian   | Myocardial infarction <sup>c</sup>            | 10                        | 10         | Severe   | None                   | Other      |
| 337              | 76/M/C       | Polytraumatism <sup>c,d</sup>                 | 45                        | 46         | Severe   | None                   | None       |
| 342              | 54/F/C       | Cardiac failure congestive                    | 31                        | 38         | Severe   | None                   | Medication |
| 350              | 61/F/Afr. Am | Palpitations                                  | 47                        | 49         | Moderate | None                   | Medication |
| <b>Oral iron</b> |              |                                               |                           |            |          |                        |            |
| 103              | 72/F/Afr. Am | Renal failure chronic <sup>c</sup>            | 13                        | 20         | Severe   | None                   | Other      |
| 109              | 53/M/Afr. Am | Renal failure chronic                         | 34                        | Ongoing    | Severe   | Unlikely               | Other      |
| 136              | 76/M/C       | Gastrointestinal haemorrhage <sup>c</sup>     | 16                        | Ongoing    | Severe   | None                   | Other      |
| 248              | 75/M/Afr. Am | Dyspnoea                                      | 56                        | 58         | Moderate | None                   | None       |
| 262              | 78/F/Afr. Am | Blood potassium increased                     | 57                        | Ongoing    | Severe   | None                   | Medication |
| 291              | 56/F/C       | Glomerulonephritis proliferative <sup>c</sup> | 44                        | Ongoing    | Severe   | None                   | Medication |
| 302              | 66/F/Afr. Am | Myocardial ischaemia                          | 42                        | 51         | Severe   | None                   | None       |
| 312              | 73/F/C       | Intestinal haemorrhage                        | 23                        | 27         | Severe   | None                   | Medication |
| 323              | 77/F/C       | Cardiac failure congestive <sup>c</sup>       | 19                        | 23         | Severe   | None                   | Other      |
|                  |              | Gastrointestinal haemorrhage <sup>c</sup>     | 19                        | 23         | Severe   | None                   | Other      |
| 333              | 76/F/C       | Cerebrovascular accident                      | 34                        | 40         | Severe   | None                   | Medication |

Afr. Am, African American; C, Caucasian; F, female; Hisp, Hispanic; M, male; Res, resolution.

<sup>a</sup>Relative day = onset date - study medication date; <sup>b</sup>As assessed by the investigator;

<sup>c</sup>Event led to premature discontinuation; <sup>d</sup>Event led to death
